# Supplementary material
Source: Royal Society of Chemistry journal article supplement (doi:10.1039/d6qm00192k)
Supplement: d6qm00192k1.pdf [file d6qm00192k1.pdf]

## Supporting Information

### Upgrading Low-Temperature Cycling Stability of Hybrid Na-Air Batteries via Sodium Biphenyl Modification

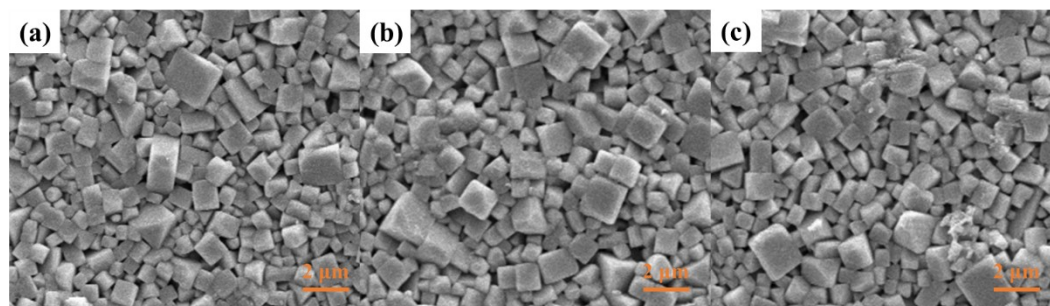

**Fig. S1** (a) SEM of primitive NASICON; (b) SEM of NASICON after immersion in a liquid anode (3 M Na-BP-DME + 20% DOL) for 10 days; (c) SEM of NASICON after immersion in the cathode electrolyte (1 M NaOH + 30% DMSO) for 10 days

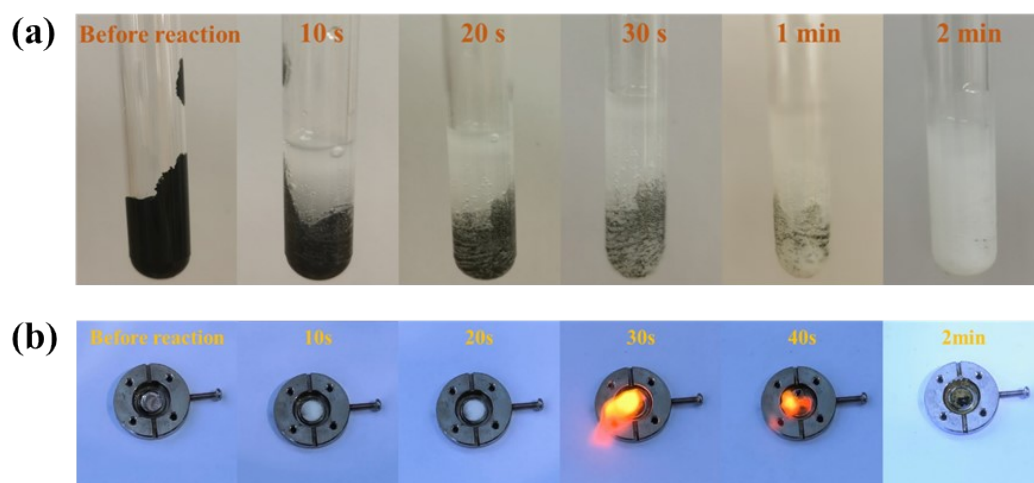

**Fig. S2** (a) Safety evaluation of the reaction between 3 M Na-BP-DME and water; (b) Safety evaluation of the reaction between Na and water

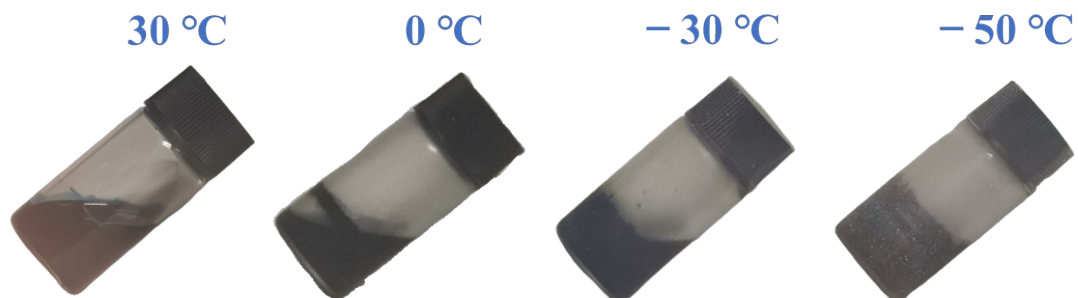

**Fig. S3** Temperature variation fluidity test of 3 M Na-BP-DME + 10% DOL liquid anode

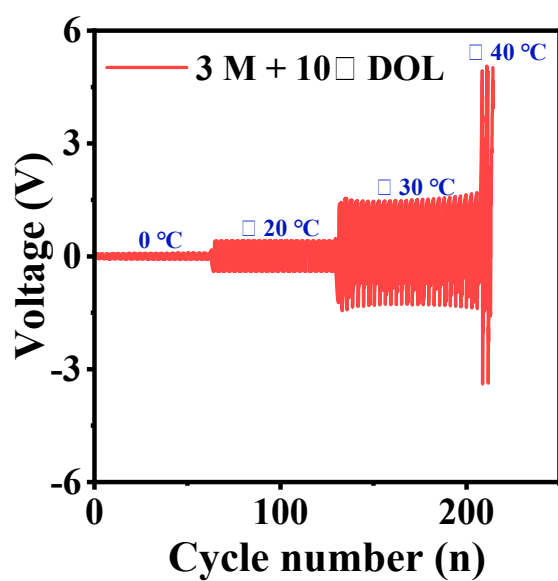

**Fig. S4** Temperature variation cycling performance test of 3 M Na-BP-DME + 10% DOL symmetrical battery

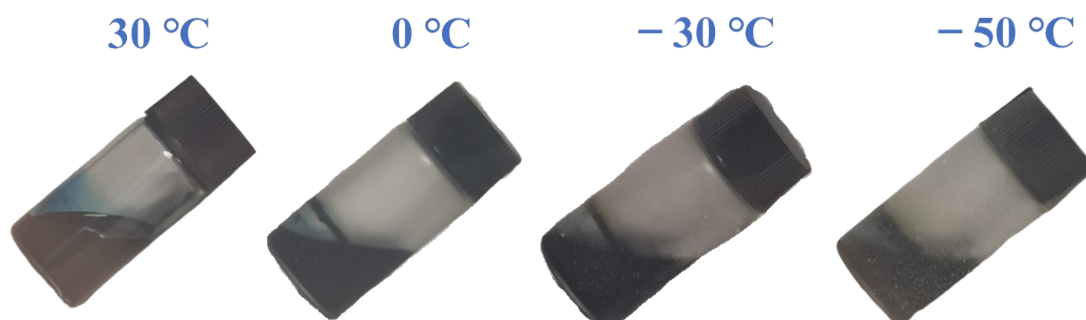

**Fig. S5** Temperature variation fluidity test of 3 M Na-BP-DME + 30% DOL liquid anode

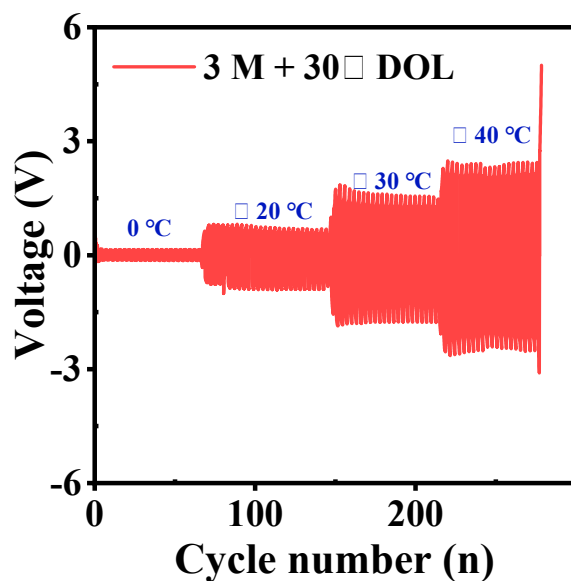

**Fig. S6** Temperature variation cycling performance test of 3 M Na-BP-DME + 30% DOL symmetrical battery

**Table S1** Elemental resistances ( $R_e$ ,  $R_i$ ,  $R_{ct}$  and  $Z_w$ ) in the equivalent circuits estimated in Na-air batteries using liquid anode.

| Battery no.       | $R_e$ ( $\Omega$ ) | $R_i$ ( $\Omega$ ) | $R_{ct}$ ( $\Omega$ ) | $Z_w$ ( $\Omega$ ) |
|-------------------|--------------------|--------------------|-----------------------|--------------------|
| Battery i (1 M)   | 85.49              | 98.02              | 18.75                 | 0.46               |
| Battery ii (3 M)  | 82.27              | 42.95              | 7.07                  | 0.41               |
| Battery iii (5 M) | 85.33              | 69.62              | 9.12                  | 0.42               |

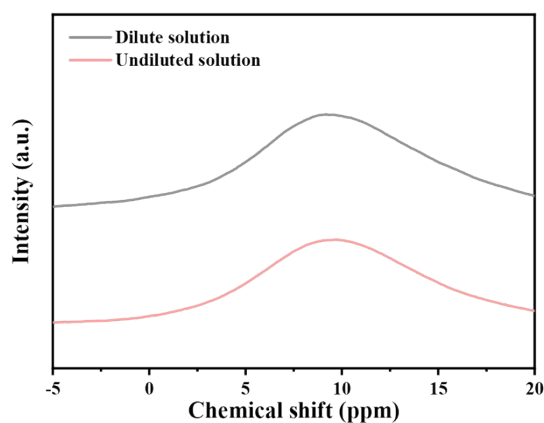

**Fig. S7**  $^{23}\text{Na}$ -NMR spectrum of diluted and undiluted liquid anodes

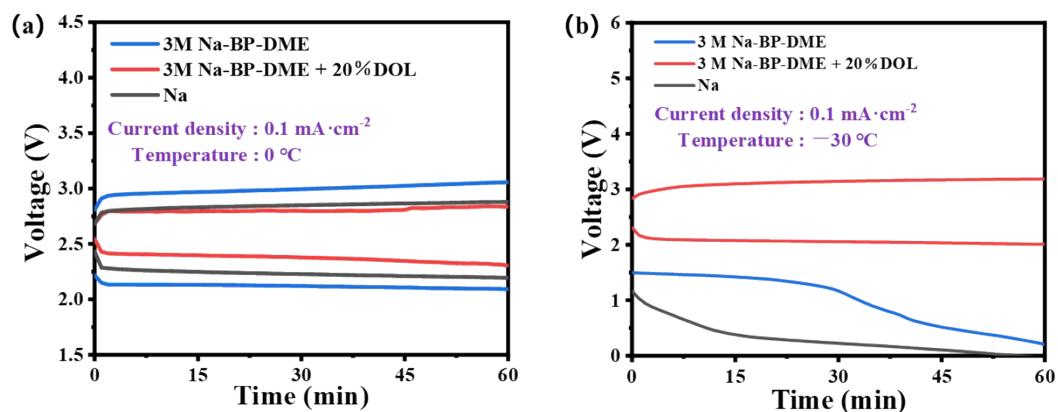

**Fig. S8** Polarization comparison of metallic sodium anode and liquid anode at: (a)  $0 \text{ }^\circ\text{C}$  and (b)  $-30 \text{ }^\circ\text{C}$

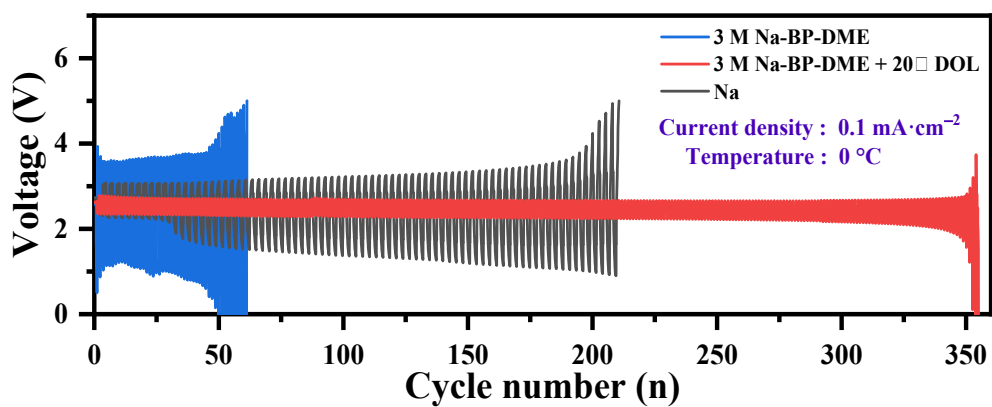

**Fig. S9** Comparison of cycling performance of air batteries assembled with metallic sodium anode and liquid anode at  $0 \text{ }^\circ\text{C}$

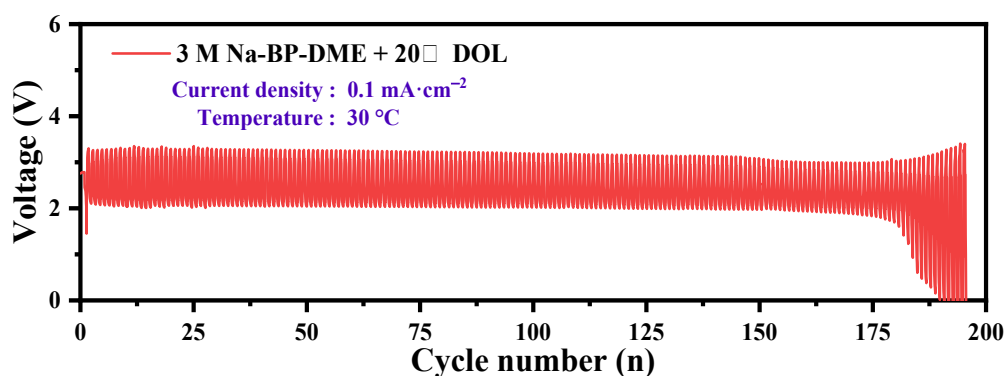

**Fig. S10** Cycling performance of air batteries assembled with 3M Na-BP-DME + 20% DOL liquid anode at  $30 \text{ }^\circ\text{C}$

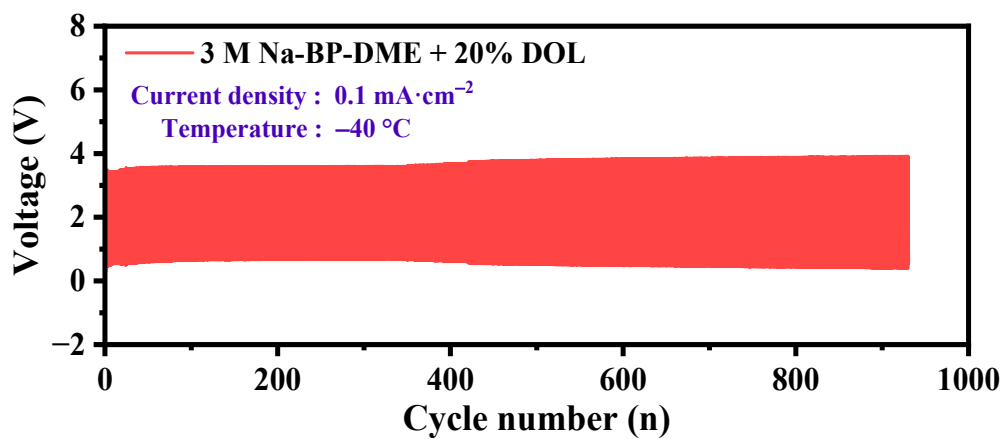

**Fig. S11** Cycling performance of air batteries assembled with 3M Na-BP-DME + 20% DOL liquid anode at  $-40\text{ }^{\circ}\text{C}$
